# Supplementary material for: Thermo- and pH-sensitive polyethylene-based diblock and triblock copolymers: synthesis and self-assembly in aqueous solution
Source: Royal Society of Chemistry journal article supplement (doi:10.1039/c2jm16197d), 2012-01-01
Supplement: c2jm16197d.pdf [file c2jm16197d.pdf]

## Supporting Information

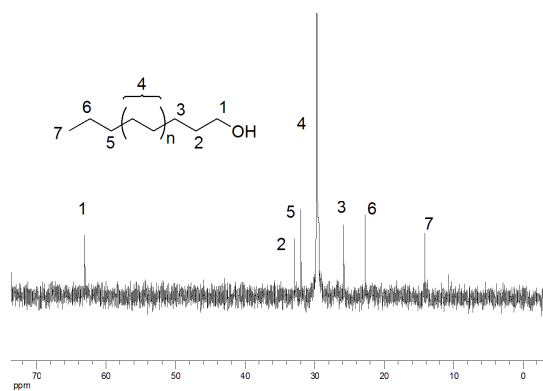

**Figure S1.**  $^{13}\text{C}$  NMR spectrum of PE-OH in 1,2-dichlorobenzene- $d_4$  at 120 °C.

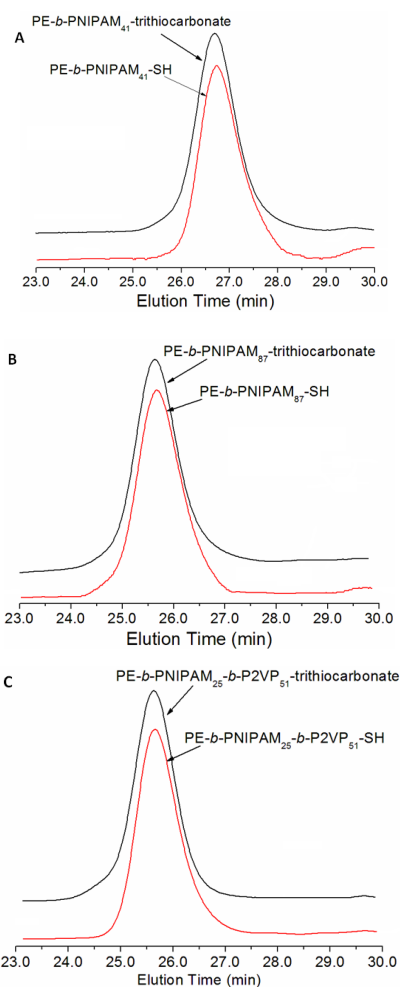

**Figure S2.** GPC traces of **A** PE-*b*-PNIPAM<sub>41</sub> **B** PE-*b*-PNIPAM<sub>87</sub> and **C** PE-*b*-PNIPAM<sub>25</sub>-*b*-P2VP<sub>51</sub>

before and after aminolysis reactions.

12

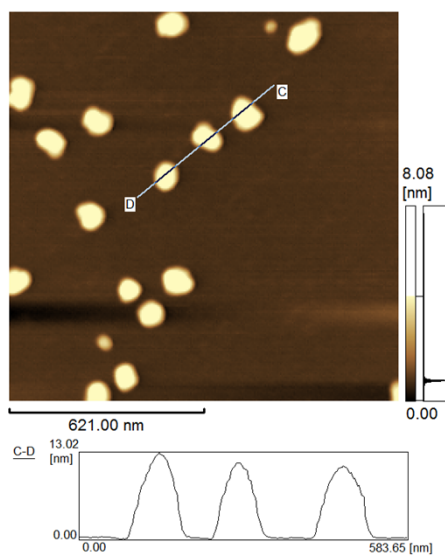

13

14

**Figure S3.** Topographic AFM images and a section analysis of the formed micelles of

15

PE-*b*-PNIPAM<sub>87</sub> after heating and cooling cycles from 20 °C to 150 °C.
